# Supplementary material for: Mesenchymal Stem Cells and MSCs-Derived Extracellular Vesicles in Infectious Diseases: From Basic Research to Clinical Practice
Source: MDPI journal article supplement (doi:10.3390/bioengineering9110662), 2022-11-08

### Supplementary materials:

The following are available online at [www.mdpi.com/xxx/s1](http://www.mdpi.com/xxx/s1), Figure S1: Growth of the global stem cell therapy market.

Figure S1. Growth of the global stem cell therapy market (<https://www.researchandmarkets.com/content-images/233/233316/2/global-stem-cell-market.png>).

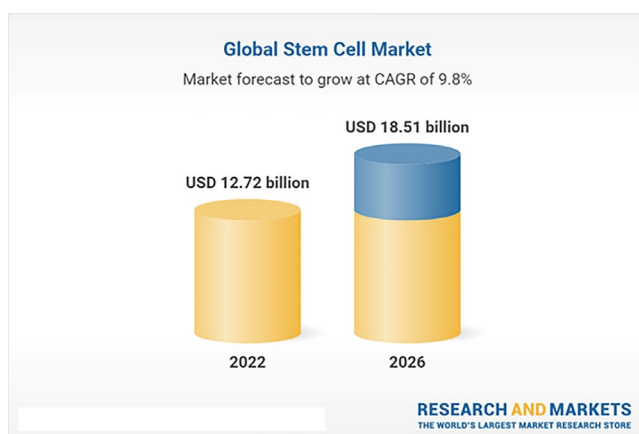

Supplement: s1 [file s1]
